# Supplementary material for: Core-Shell Structure Design of Hollow Mesoporous Silica Nanospheres Based on Thermo-Sensitive PNIPAM and pH-Responsive Catechol-Fe3+ Complex
Source: PubMed Central journal article supplement (PMC6918372; doi:10.3390/polym11111832), 2019-11-07
Supplement: polymers-11-01832-s001.pdf [file polymers-11-01832-s001.pdf]

## Supporting information

### **Core-shell structure design of hollow mesoporous silica nanospheres for dual pH/thermo-sensitivity**

Peng Wei Li, Zhang Ze Ping\*, Rong Min Zhi\* and Zhang Ming Qiu

Key Laboratory for Polymeric Composite and Functional Materials of Ministry of  
Education, GD HPPC Lab, School of Chemistry, Sun Yat-sen University, Guangzhou

510275, P. R. China

Email: 357386053@qq.com, cesrmz@mail.sysu.edu.cn

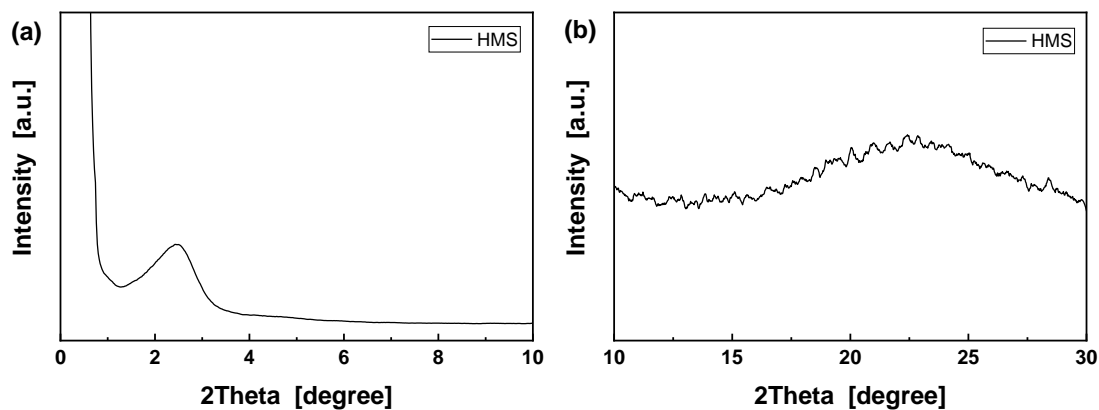

**Figure S1.** Powder XRD patterns of HMS (preparation conditions:  $m(\text{CTAB}):m(\text{TEOS}):m(\text{PS}) = 0.5:1:1$ ).

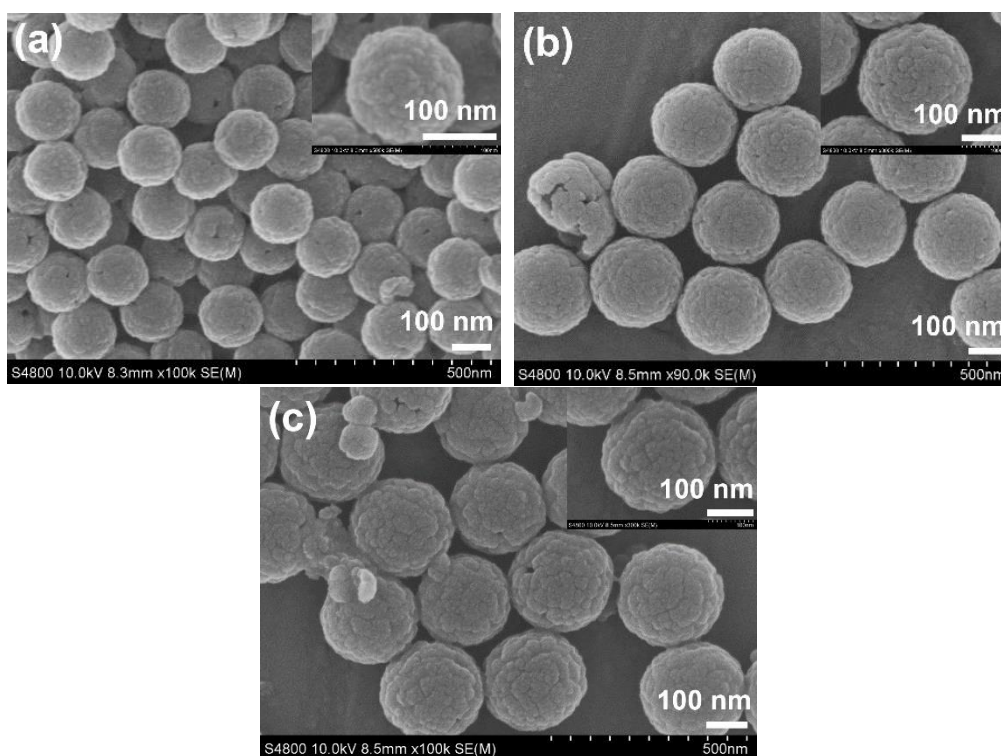

**Figure S2.** SEM images of HMS obtained from 145 nm (a) and 212 nm (b) PS template microsphere, respectively. Preparation conditions:  $m(\text{CTAB}):m(\text{TEOS}):m(\text{PS}) = 0.5:1:1$ . (c) SEM images of HMS obtained from 212 nm PS template microsphere. Preparation conditions:  $m(\text{CTAB}):m(\text{TEOS}):m(\text{PS}) = 0.5:1.5:1$ .

**Table S1.** Structure properties of HMS prepared with various ratio of CTAB and TEOS

| $m(\text{CTAB}):m(\text{TEOS})$ | $S_{\text{BET}}$<br>( $\text{m}^2 \text{g}^{-1}$ ) | $V_{\text{tot}}$<br>( $\text{cm}^3 \text{g}^{-1}$ ) | Pore size<br>(nm) |
|---------------------------------|----------------------------------------------------|-----------------------------------------------------|-------------------|
| 0                               | 144                                                | 0.072                                               | -                 |
| 0.2                             | 715                                                | 0.901                                               | 2.2               |

|     |     |       |     |
|-----|-----|-------|-----|
| 0.5 | 866 | 1.203 | 2.3 |
| 0.9 | 895 | 1.482 | 2.2 |

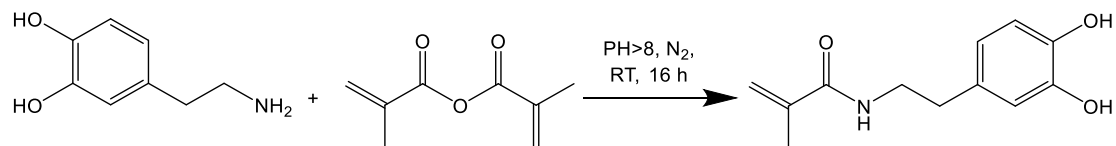

**Scheme S1.** The synthesis mechanism of DMA.

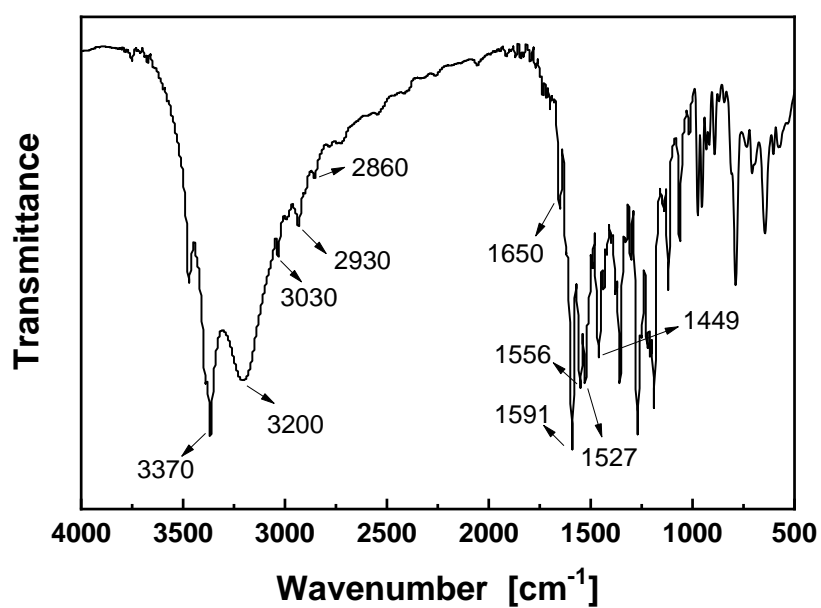

**Figure S3.** FT-IR spectra of DMA.

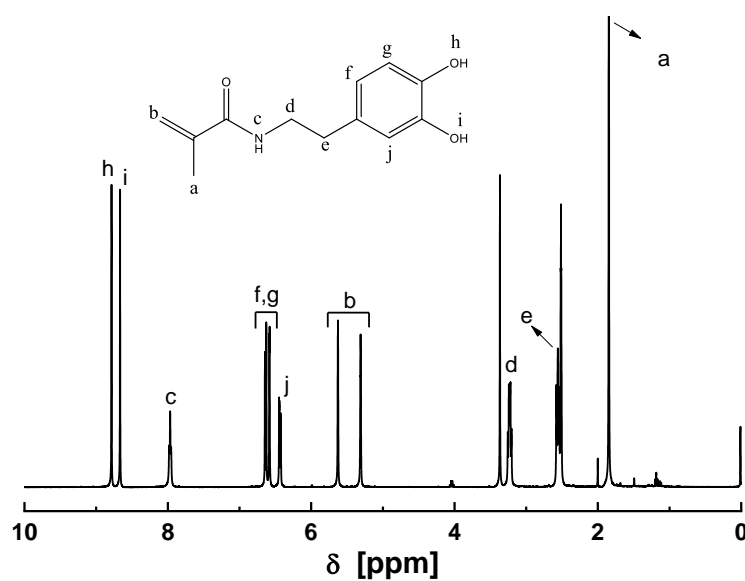

**Figure S4.**  $^1\text{H}$  NMR spectra of DMA in  $\text{DMSO-}d_6$ .

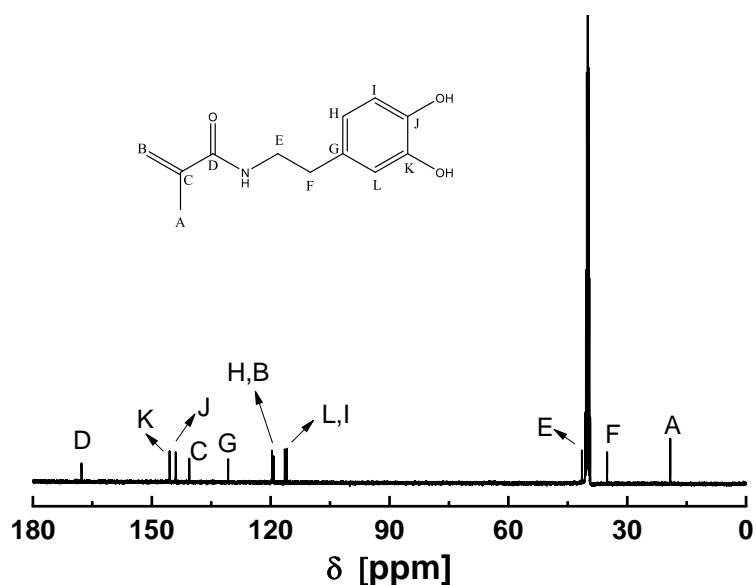

Figure S5.  $^{13}\text{C}$  NMR spectra of DMA in  $\text{DMSO-}d_6$ .

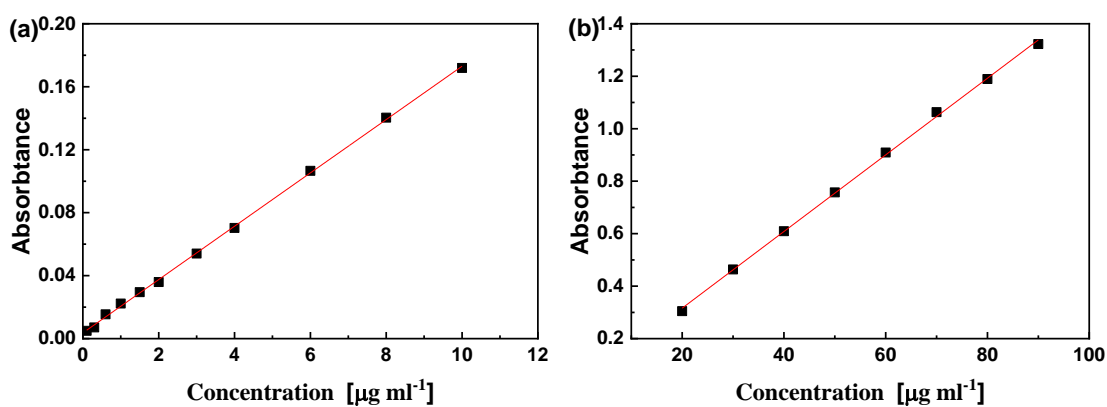

Figure S6. The standard curve of DOX obtained from ultraviolet absorption at 480 nm in the concentration range of 0~10  $\mu\text{g ml}^{-1}$  (a) and 20~90  $\mu\text{g ml}^{-1}$  (b).

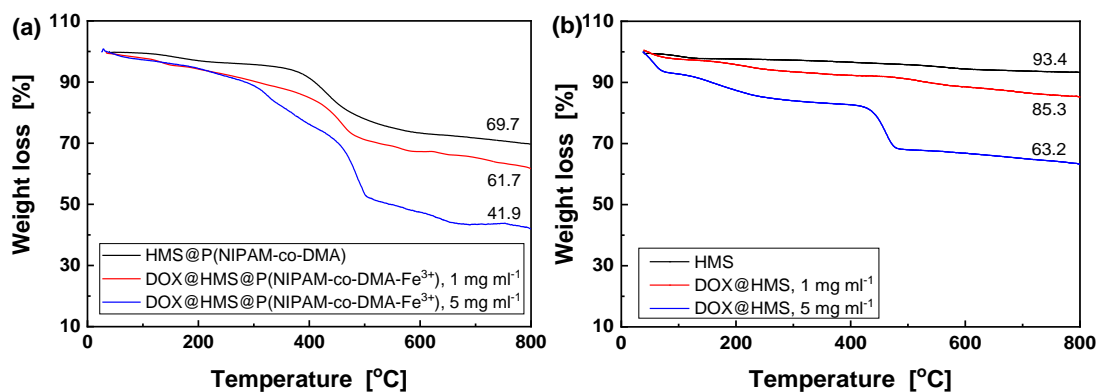

Figure S7. TGA curves of (a) DOX@HMS@P(NIPAM-co-DMA) and un-modified HMS (b) obtained from DOX/PBS of different concentrations.

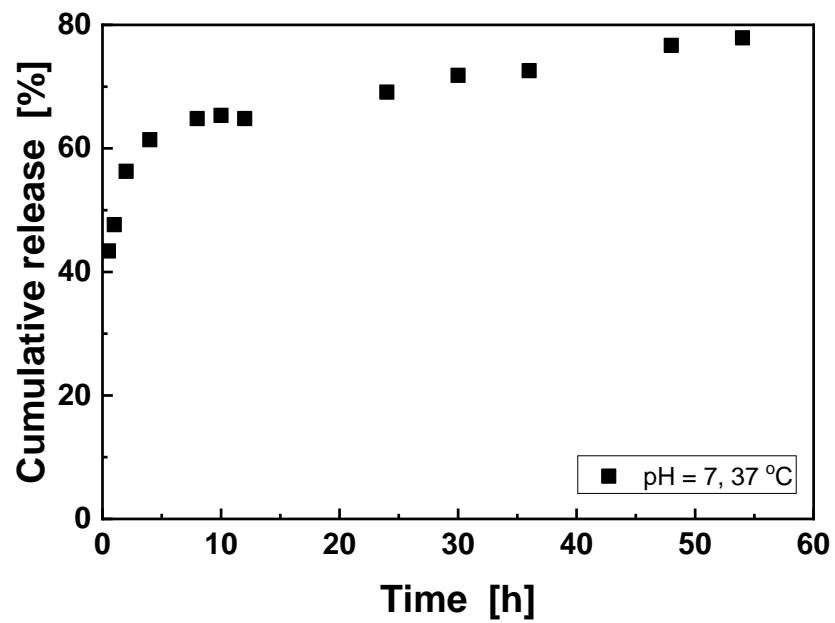

Figure S8. Cumulative release of DOX from DOX@HMS.
